# Supplementary material for: Differences in Cholecystectomy Outcomes and Operating Time Between Male and Female Surgeons in Sweden
Source: PubMed Central journal article supplement (PMC10469280; doi:10.1001/jamasurg.2023.3736), 2023-08-30
Supplement: jamasurg-e233736-s001.pdf [file jamasurg-e233736-s001.pdf]

## Data Sharing Statement

Blohm. Differences in Cholecystectomy Outcomes and Operating Time Between Male and Female Surgeons in Sweden. *JAMA Surg.* Published August 30, 2023.

doi:10.1001/jamasurg.2023.3736

### Data

**Data available:** Yes

**Data types:** Deidentified participant data

**How to access data:** The de-identified participant data and statistical code are available from the corresponding author ([my.blohm@ki.se](mailto:my.blohm@ki.se)) with publication, upon reasonable request and after approval of the proposal by the research team.

**When available:** With publication

### Supporting Documents

**Document types:** Statistical/analytic code

**How to access documents:** The de-identified participant data and statistical code are available from the corresponding author ([my.blohm@ki.se](mailto:my.blohm@ki.se)) with publication, upon reasonable request and after approval of the proposal by the research team.

**When available:** With publication

### Additional Information

**Who can access the data:** Data will be made available to researchers upon reasonable request and after approval of proposal by the research team.

**Types of analyses:** For specified purposes, after reasonable request.

**Mechanisms of data availability:** After approval of proposal by the research team
